# Supplementary material for: Aberrant NOVA1 function disrupts alternative splicing in early stages of amyotrophic lateral sclerosis
Source: PubMed Central journal article supplement (PMC9381448; doi:10.1007/s00401-022-02450-3), 2022-07-01
Supplement: 401_2022_2450_MOESM1_ESM.pdf [file 401_2022_2450_MOESM1_ESM.pdf]

## Supplementary Figures and Tables

### **Aberrant NOVA1 function disrupts alternative splicing in early stages of amyotrophic lateral sclerosis**

Florian Krach<sup>1,2</sup>, Emily C. Wheeler<sup>2</sup>, Martin Regensburger<sup>1,3,4</sup>, Tom Boerstler<sup>1</sup>, Holger Wend<sup>1</sup>, Anthony Q. Vu<sup>2</sup>, Ruth Wang<sup>2</sup>, Stephanie Reischl<sup>1</sup>, Karsten Boldt<sup>6</sup>, Ranjan Batra<sup>2</sup>, Stefan Aigner<sup>2</sup>, John Ravits<sup>5</sup>, Juergen Winkler<sup>3,4</sup>, Gene W. Yeo<sup>2\*</sup>, Beate Winner<sup>1,3\*</sup>

<sup>1</sup> Department of Stem Cell Biology, University Hospital Erlangen, Friedrich-Alexander University of Erlangen-Nürnberg (FAU)

<sup>2</sup> Department of Cellular and Molecular Medicine, University of California San Diego

<sup>3</sup> Center of Rare Diseases Erlangen (ZSEER), University Hospital Erlangen, Friedrich-Alexander University of Erlangen-Nürnberg (FAU)

<sup>4</sup> Department of Molecular Neurology, University Hospital Erlangen, Friedrich-Alexander University of Erlangen-Nürnberg (FAU)

<sup>5</sup> Department of Neurosciences, University of California San Diego

<sup>6</sup> Core Facility for Medical Bioanalytics, University of Tübingen, Germany

\*co-correspondence: [geneyeo@ucsd.edu](mailto:geneyeo@ucsd.edu) and [beate.winner@fau.de](mailto:beate.winner@fau.de)

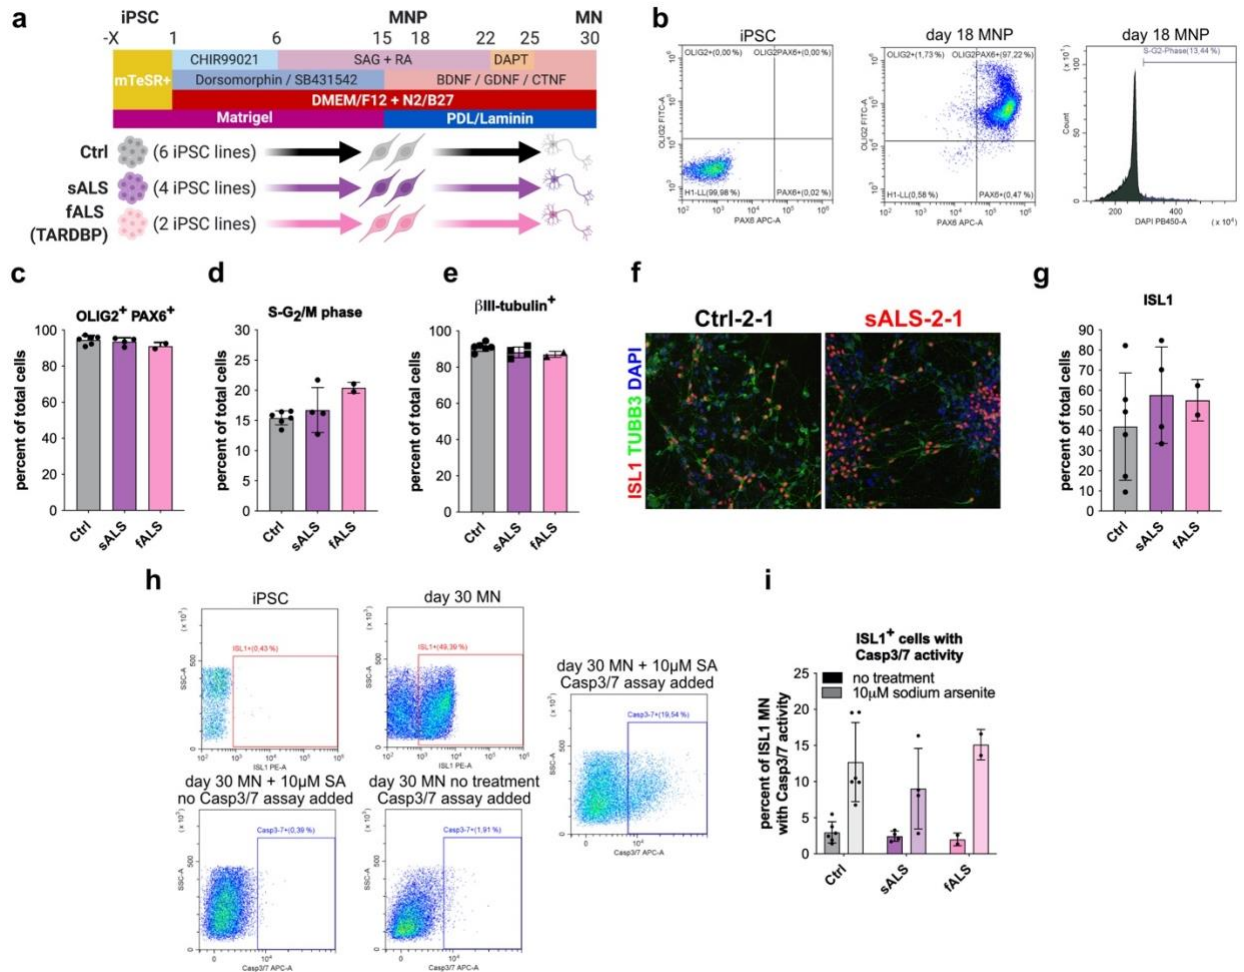

### Online Resource Fig. 1. Related to Fig. 1. Differentiation of iPSC into MNs

(a) Schematic showing differentiation protocol with number of lines used from all experimental groups (n=6 ALS, n=6 Ctrl).

(b) gating strategy for OLIG2 / PAX6 FACS with iPSC (left), OLIG2 / PAX6 FACS with d18 MNP (middle) and cell cycle analysis (DAPI; right).

(c) Bar graph of the fraction of OLIG2/PAX6 double positive cells at day 18 of differentiation as measured by FACS. Data presented as mean +SD.

(d) Bar graph of the fraction of cells in S-G2/M phase of cell cycle at day 18 of differentiation as measured by FACS of DAPI stained cells. Data presented as mean +SD.

(e) Bar graph of the fraction of  $\beta$ III-tubulin positive cells at day 30 of differentiation as measured by FACS. Data presented as mean +SD.

(f) Representative images of MNs at day 30 of differentiation stained for ISL1 (red),  $\beta$ III-tubulin (green) and DAPI.

(g) Quantification of the fraction of ISL1 positive MNs at day 30 of differentiation. Data presented as mean +SD.

(h) Gating strategy for d30 MN analysis. Top two graphs depict gating for ISL1 in iPSC (left) and MN (right). Bottom two graphs and graph to the total right show gating for Caspase 3/7 assay.

(i) Quantification of the fraction of ISL1 positive MNs with Caspase 3/7 activity after no treatment or treatment with 10 $\mu$ M sodium arsenite for 21h. Data presented as mean +SD.

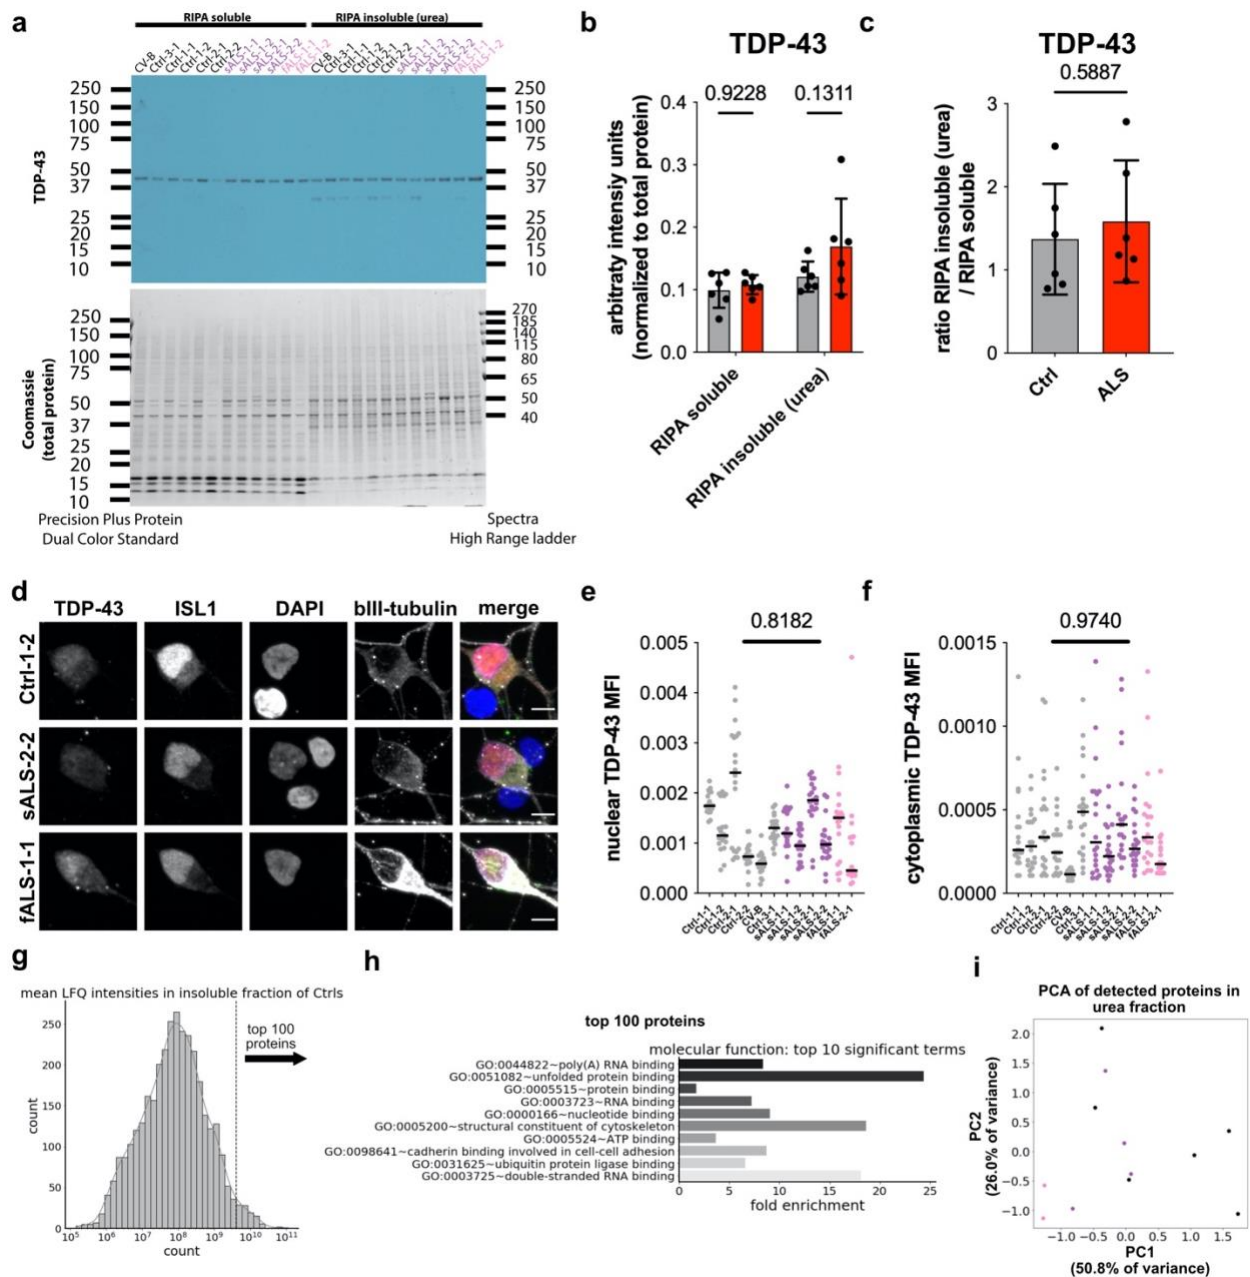

## Online Resource Fig. 2. Related to Fig. 1. TDP-43 pathology and protein insolubility analysis

(a) Western blot of TDP-43 in soluble and insoluble fractions and corresponding Coomassie-stained gel (n=6 ALS, n=6 Ctrl).

(b) Densitometric quantification of TDP-43 western blot normalized to the Coomassie controls. Statistical significance was determined by 2-way ANOVA. P values were corrected using FDR. Data presented as mean  $\pm$ SD (gray bars: Ctrl; red bars: ALS) and individual values (dots) (n=6 ALS, n=6 Ctrl). P value shown as number on the top.

(c) ratio insoluble / soluble of densitometric quantification of TDP-43 western blots normalized to the Coomassie controls. Statistical significance was determined by Mann-Whitney U test. Data presented as mean  $\pm$ SD (gray bars: Ctrl; red bars: ALS) and individual values (dots) (n=6 ALS, n=6 Ctrl). P value shown as number on the top.

(d) Representative images of iPSC-MNs stained for TDP-43 (green), ISL1 (red),  $\beta$ -tubulin (gray) and DAPI (blue). Scale bar: 5 $\mu$ m.

(e) Scatter plot of nuclear TDP-43 mean fluorescent intensities (MFI) of individual ISL1 MN (n=20/cell line; dots) in Ctrl (n=6) and ALS (n=6). Black bar represents median in a cell line. Statistical significance was determined on medians by Mann-Whitney U test. P value = 0.8182.

(f) Scatter plot of cytoplasmic TDP-43 mean fluorescent intensities (MFI) of individual ISL1 MN (n=20/cell line; dots) in Ctrl (n=6) and ALS (n=6). Black bar represents median in a cell line. Statistical significance was determined on medians by Mann-Whitney U test. P value = 0.9740.

(g) Histogram of the mean LFQ intensities of the six control samples representing values > 0. X-axis in log<sub>10</sub> scale.

(h) Bar graph of enrichment of molecular function GO terms of the 100 proteins with the highest LFQ intensities in controls. The top 10 most significantly enriched GO terms are shown.

(i) Principal component analysis (PCA) of LFQ intensities from the different samples (Ctrl: black; sALS: purple; fALS: pink).

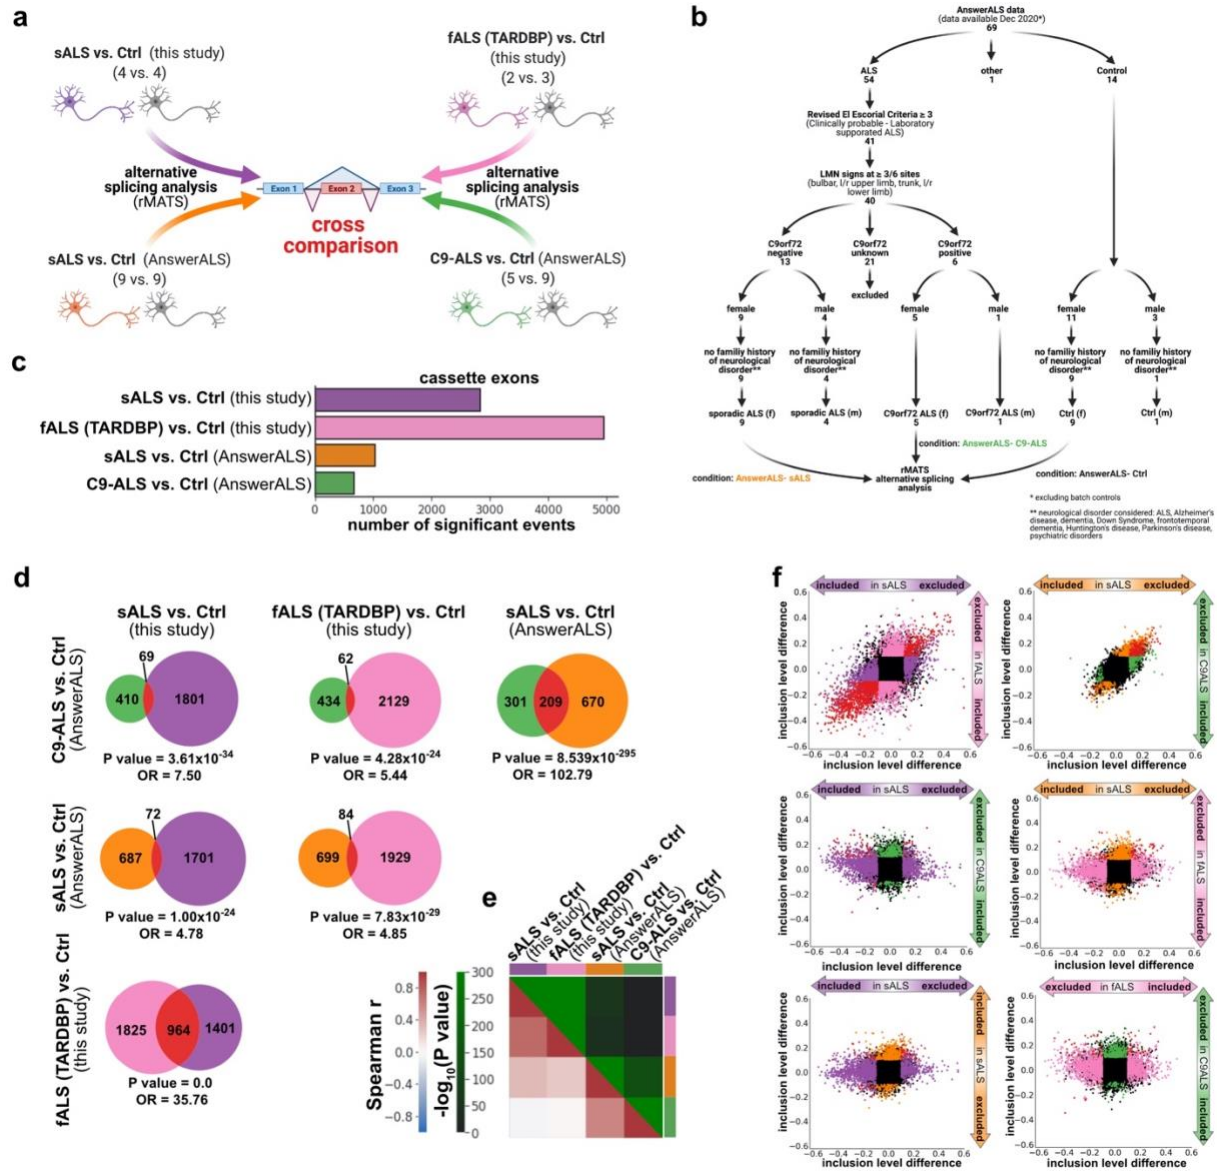

**Online Resource Fig. 3. Related to Fig. 2. Degree of AS in ALS iPSC-MNs.**

(a) Schematic illustrating the datasets generated in this study (sALS vs. Ctrl, fALS vs. Ctrl), the AnswerALS consortium (sALS vs. Ctrl and C9-ALS vs. Ctrl) and the lines included.

(b) Schematic illustrating number of patients and criteria set for inclusion of individuals in our comparisons from the AnswerALS consortium (<http://data.answerals.org>).

(c) Bar graph of the number of significantly differentially alternatively spliced cassette exons in the four ALS datasets (sALS, fALS, sALS-AA, C9-ALS-AA). FDR < 0.05, |InclLevelDifference| > 0.1, coverage > 10 reads in each sample in a given dataset.

(d) Venn diagrams of pairwise comparisons and overlap of significantly differentially alternatively spliced cassette exons between two datasets. Significance of overlap was calculated with Fisher's exact test using all events detected in both analyses as background. OR = odds ratio.

(e) Heatmap of Spearman correlation coefficients of inclusion level differences from two datasets, respectively. Correlation coefficients are shown in blue-red color scale and significance of correlation is shown on a black-green scale.

(f) Scatter plots of pair-wise comparisons of inclusion level differences of all detected exon junctions in the sALS vs. Ctrl (purple) and fALS vs. Ctrl (pink) datasets generated in this study, and the sALS vs. Ctrl (orange) and C9-ALS vs. Ctrl (green) datasets from the AnswerALS consortium. Events that are called significant in both analyses are depicted in red.



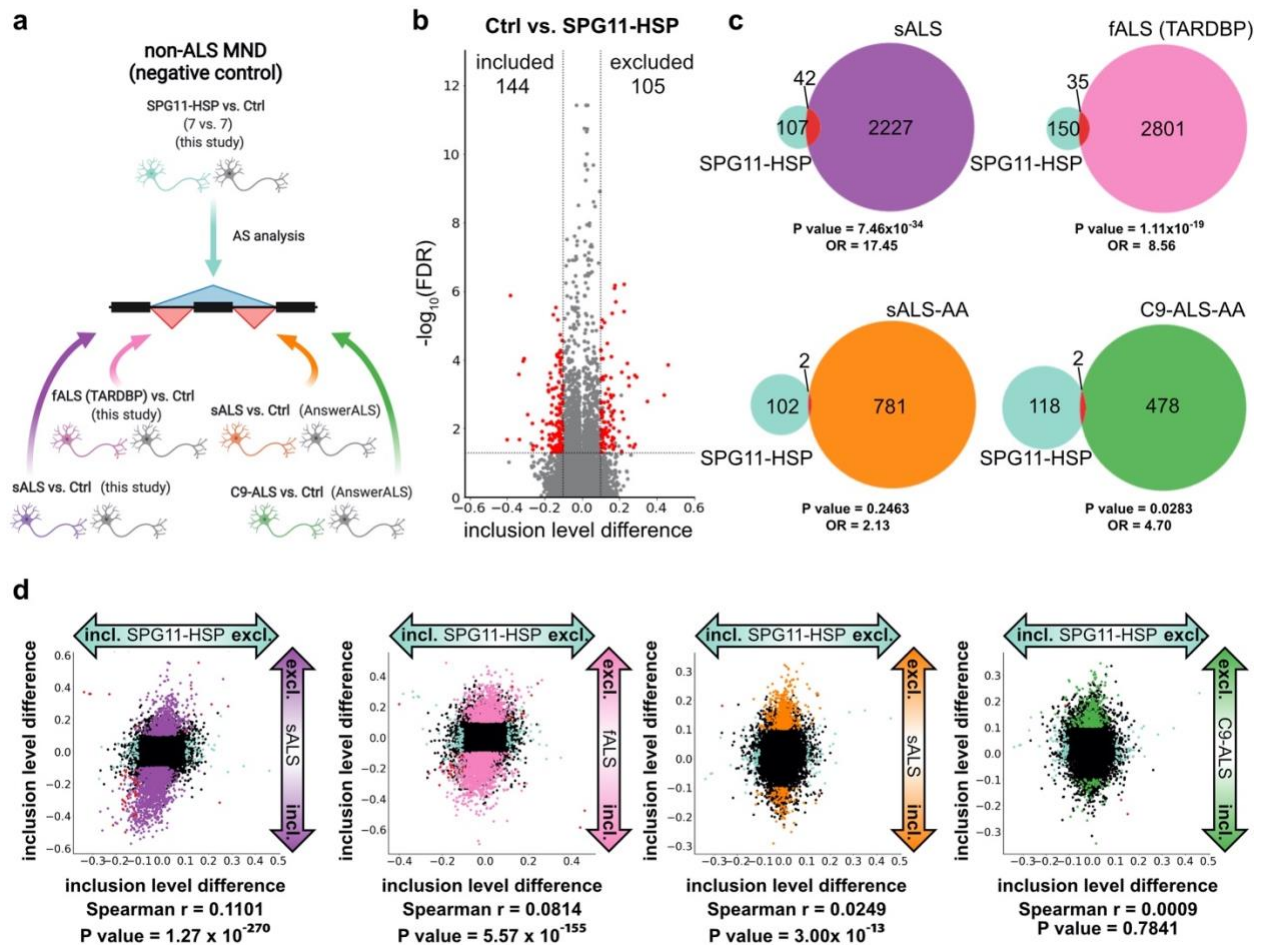

**Online Resource Fig. 4. Related to Fig. 2. Degree of AS in SPG11-HSP iPSC-MN**

(a) Schematic illustrating the analysis of the SPG11-HSP dataset ( $n=7$  SPG11-HSP;  $n=7$  Ctrl; included is one isogenic pair; cyan) and comparison to the ALS datasets.

(b) Volcano plot showing inclusion level difference (x) and significance (y, negative  $\log_{10}$  (FDR)) of AS events significantly differentially spliced (red dots) in SPG11-HSP patients.

(c) Venn diagrams of pairwise comparisons and overlap of significantly differentially alternatively spliced cassette exons between SPG11-HSP and ALS datasets. Significance of overlap was calculated with Fisher's exact test using all events detected in both analyses as background. OR = odds ratio.

(d) Scatter plots of pair-wise comparisons of inclusion level differences of all detected exon junctions in SPG11-HSP (cyan) and sALS vs. Ctrl (purple) and fALS vs. Ctrl (pink) datasets, and the sALS vs. Ctrl (orange) and C9-ALS vs. Ctrl (green) datasets from the



AnswerALS consortium. Events that are called significant in both analyses are depicted in red.



(c) Ratio insoluble / soluble of densitometric quantification of western blots normalized to the Coomassie controls. Statistical significance was determined by Mann-Whitney U test. Data presented as median  $\pm$ IQR (gray bar: eGFP overexpression; blue bar: NOVA1 overexpression) and individual values (dots) (n=4 eGFP, n=4 NOVA1). \* P value < 0.05; \*\* P value < 0.01; \*\*\* P value < 0.001; \*\*\*\* P value < 0.0001.

(d) Schematic illustrating methodology for generating NOVA1 K.O. iPSC.

(e) Genotyping of individual clones from NOVA1 KO iPSC generation.

(f) Bar graph of the percentage of NOVA1 iPSC lines generated with NANOG (black) and LIN28A (blue) expression determined via FACS. Cell lines in bold were used for further analyses.

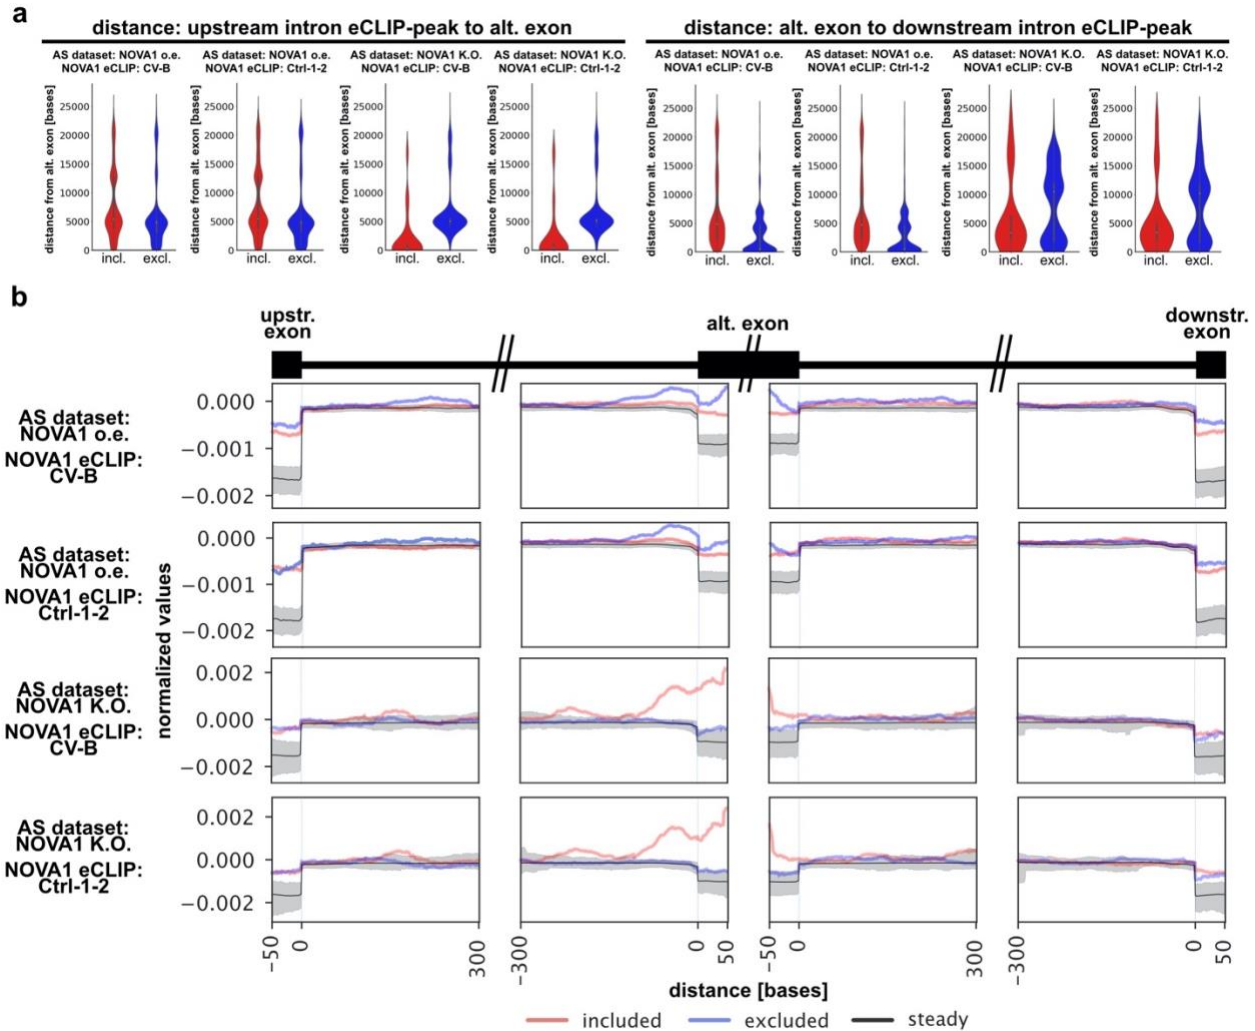

**Online Resource Fig. 6. Related to Fig. 4.** NOVA1 binding at AS events changed upon altered NOVA1 levels.

(a) Violin plots of the distribution of distances of eCLIP-seq peaks in upstream intron (left graphs, red) and downstream introns (right graphs, blue) to alternative exons in AS events included (red) and excluded (blue) in datasets from altered NOVA1 levels.

(b) RBP binding maps from NOVA1 eCLIP-seq data illustrating NOVA1 binding densities of NOVA1-bound AS events significantly excluded (blue), included (red) or unaltered (black) in a given dataset with altered NOVA1 levels. X axes represent distance in bases.

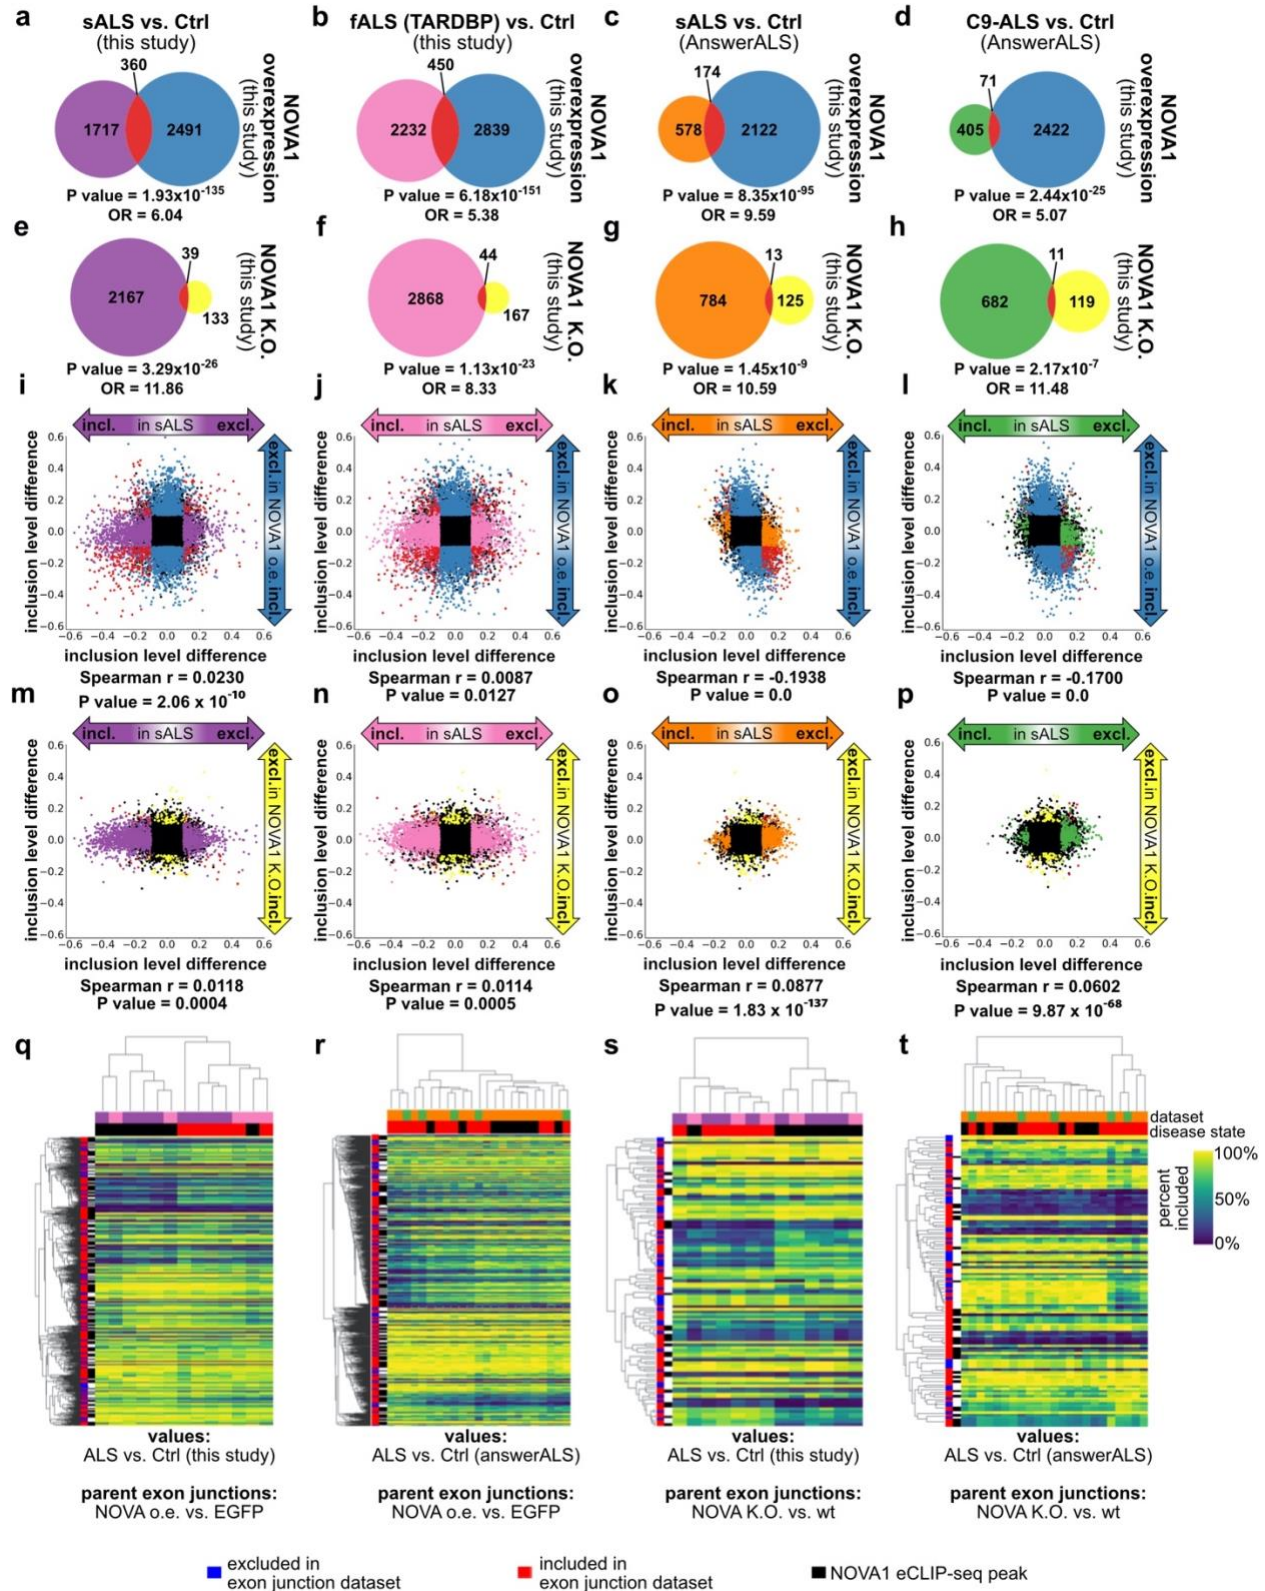

**Online Resource Fig. 7. Related to Fig. 5. Inclusion values in ALS and Ctrl samples of AS events altered upon modulation of NOVA1 levels.**

(a-d) Venn diagrams of significant differentially alternatively spliced cassette exons between NOVA1 vs. EGFP overexpression (blue) and (a) sALS vs. Ctrl datasets from this study (purple), (b) fALS vs. Ctrl datasets from this study (pink), (c) sALS vs. Ctrl datasets from AnswerALS (orange), (d) C9-ALS vs. Ctrl datasets from AnswerALS (green). Significance of overlap was calculated with Fisher's exact test using all events detected in both analyses as background. OR = odds ratio.

(e-h) Venn diagrams of significant differentially alternatively spliced cassette exons between NOVA1 wt. NOVA1 K.O. (yellow) and (e) sALS vs. Ctrl datasets (purple), (f) fALS vs. Ctrl datasets (pink), (g) sALS vs. Ctrl datasets from AnswerALS (orange), (h) C9-ALS vs. Ctrl datasets from AnswerALS (green). Significance of overlap was calculated with Fisher's exact test using all events detected in both analyses as background. OR = odds ratio.

(i-l) Scatter plot of inclusion level differences of all detected exon junctions in NOVA1 vs. EGFP overexpression (blue) and (i) sALS vs. Ctrl datasets (purple), (j) fALS vs. Ctrl datasets (pink), (k) sALS vs. Ctrl datasets from AnswerALS (orange), (l) C9-ALS vs. Ctrl datasets from AnswerALS (green). Spearman rank correlation coefficient ( $r$ ) and significance of correlation ( $P$  value) are shown below the blot (calculated with `scipy.stats.spearmanr`). Events that are called significant in both analyses are depicted in red.

(m-p) Scatter plots of inclusion level differences of all detected exon junctions in NOVA1 wt vs. NOVA1 K.O. (blue) and (m) sALS vs. Ctrl datasets (purple), (n) fALS vs. Ctrl datasets (pink), (o) sALS vs. Ctrl datasets from AnswerALS (orange), (p) C9-ALS vs. Ctrl datasets from AnswerALS (green). Spearman rank correlation coefficient ( $r$ ) significance of correlation ( $P$  value) are depicted below the blot (calculated with `scipy.stats.spearmanr`). Events that are called significant in both analyses are depicted in red.

(q-t) Heatmap of percent spliced-in values of (q) ALS vs. Ctrl from this study in AS events changed in NOVA1 vs. EGFP overexpression, (r) ALS vs. Ctrl from the AnswerALS consortium in AS events changed in NOVA1 vs. EGFP overexpression, (s) ALS vs. Ctrl from this study in AS events changed in NOVA1 wt vs. NOVA1 KO, and (t) ALS vs. Ctrl from the AnswerALS consortium in AS events changed in NOVA1 wt vs. NOVA1 KO.



Clustering was performed using correlation distance. The left columns next to the heatmaps indicate events bound by at least one NOVA1 eCLIP-seq experiment (black: bound, white: not bound). The right columns next to the heatmaps indicate AS inclusion state in datasets from altered NOVA1 expression (red: included, blue: excluded). The top bars above the heatmaps indicate the dataset origin of a given sample (purple: sALS vs. Ctrl, this study; pink: fALS vs. Ctrl, this study; orange: sALS vs. Ctrl, AnswerALS; and green: C9-ALS vs. Ctrl, AnswerALS). The bottom bar above the heatmap represent disease state of a sample (black: Ctrl); red: ALS).

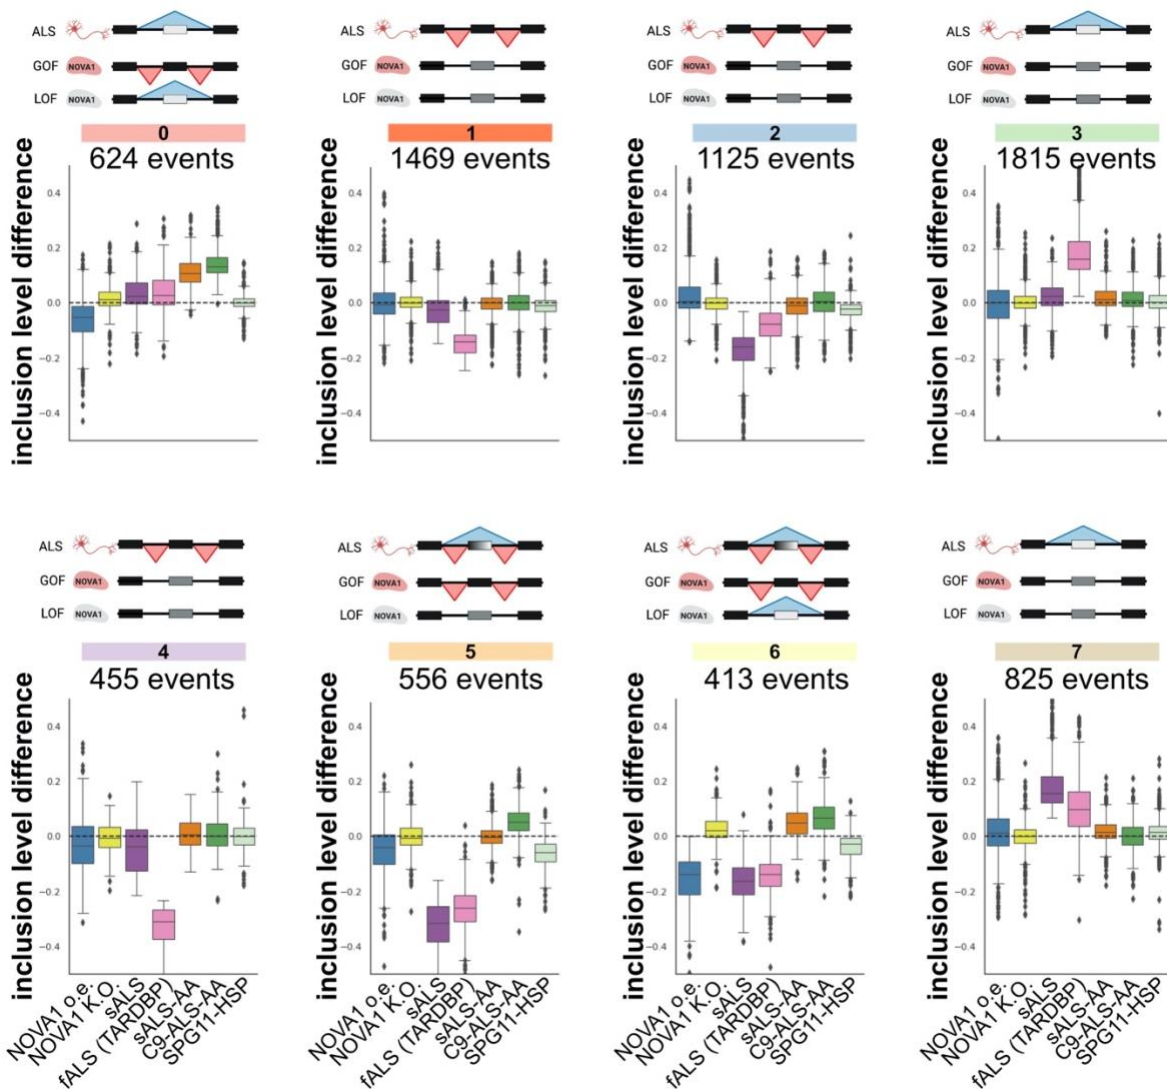

**Online Resource Fig. 8. Related to Fig. 5.** Individual AS clusters in ALS and SPG11-HSP.

Boxplots of inclusion level differences in clusters 0 - 7 (sALS vs. Ctrl: purple; fALS vs. Ctrl: pink; sALS vs. Ctrl (AA): orange; C9-ALS vs. Ctrl (AA): green; SPG11-HSP vs. Ctrl: cyan; NOVA1 vs. EGFP overexpression (blue) and NOVA1 wt vs. NOVA1 K.O. (yellow). Ideogram on top illustrate the direction of the most prominent observed change in ALS, NOVA1 gain of function (GOF) and NOVA1 loss of function (LOF) (from top to bottom).

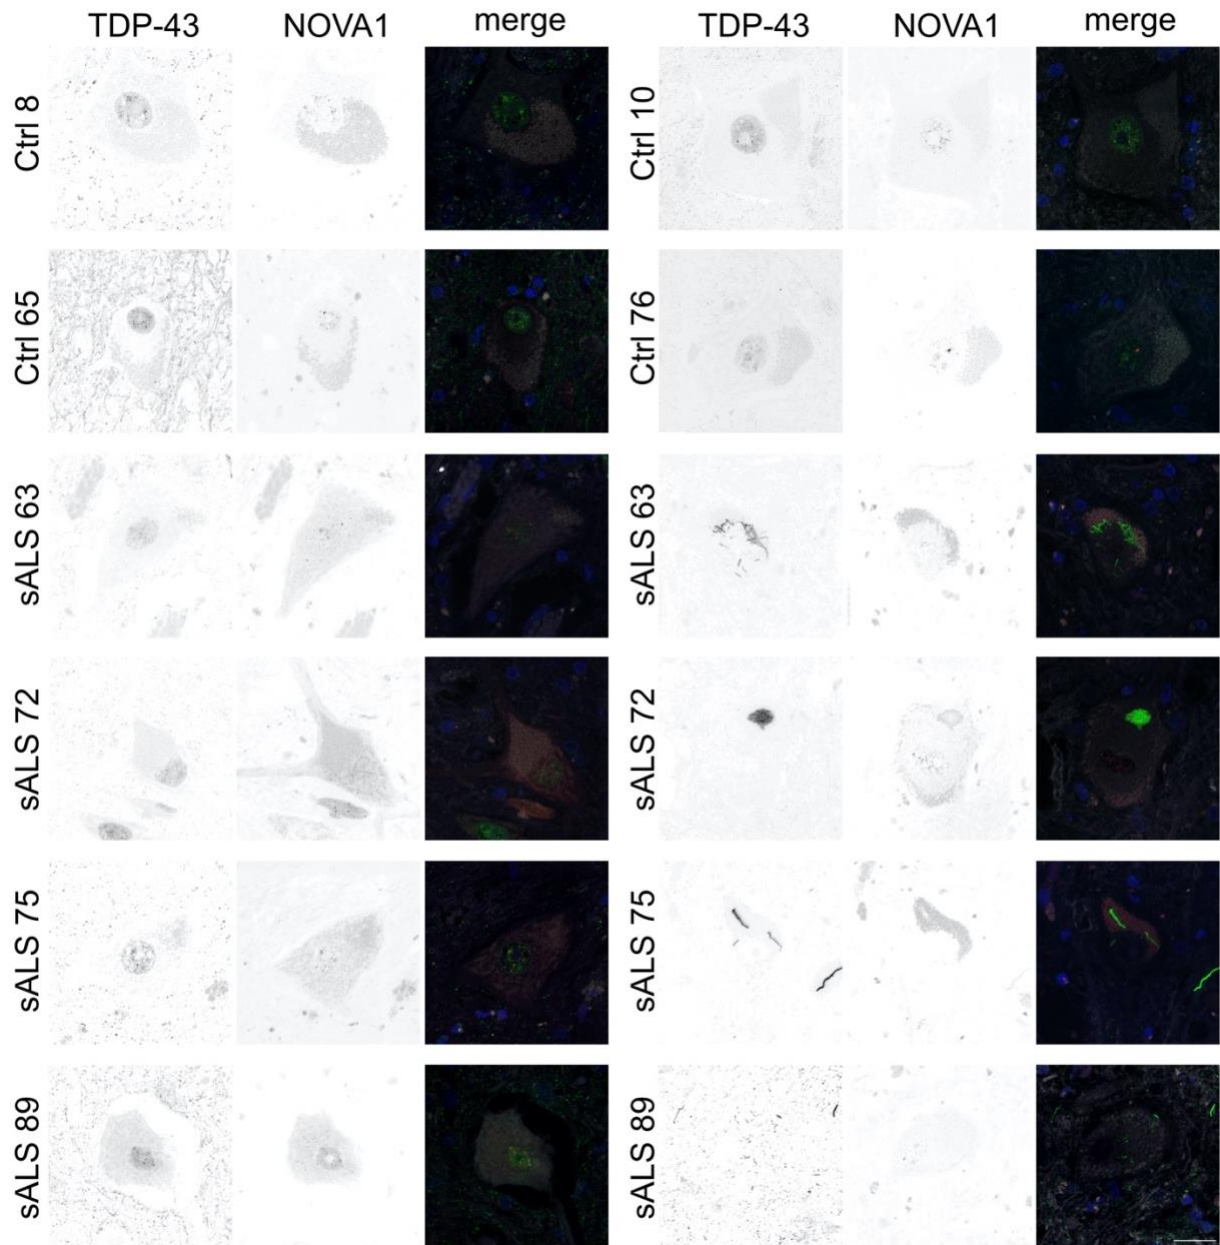

**Online Resource Fig. 9. Related to Fig. 6.** Spectrum of TDP-43 pathology and corresponding NOVA1 staining postmortem spinal cord tissue of sALS. Representative images of MN in sALS patient postmortem tissue. Pictures stained for TDP-43 (green), NOVA1 (red), bIII-tubulin (gray) and DAPI (blue). Scale bars: 25µm.

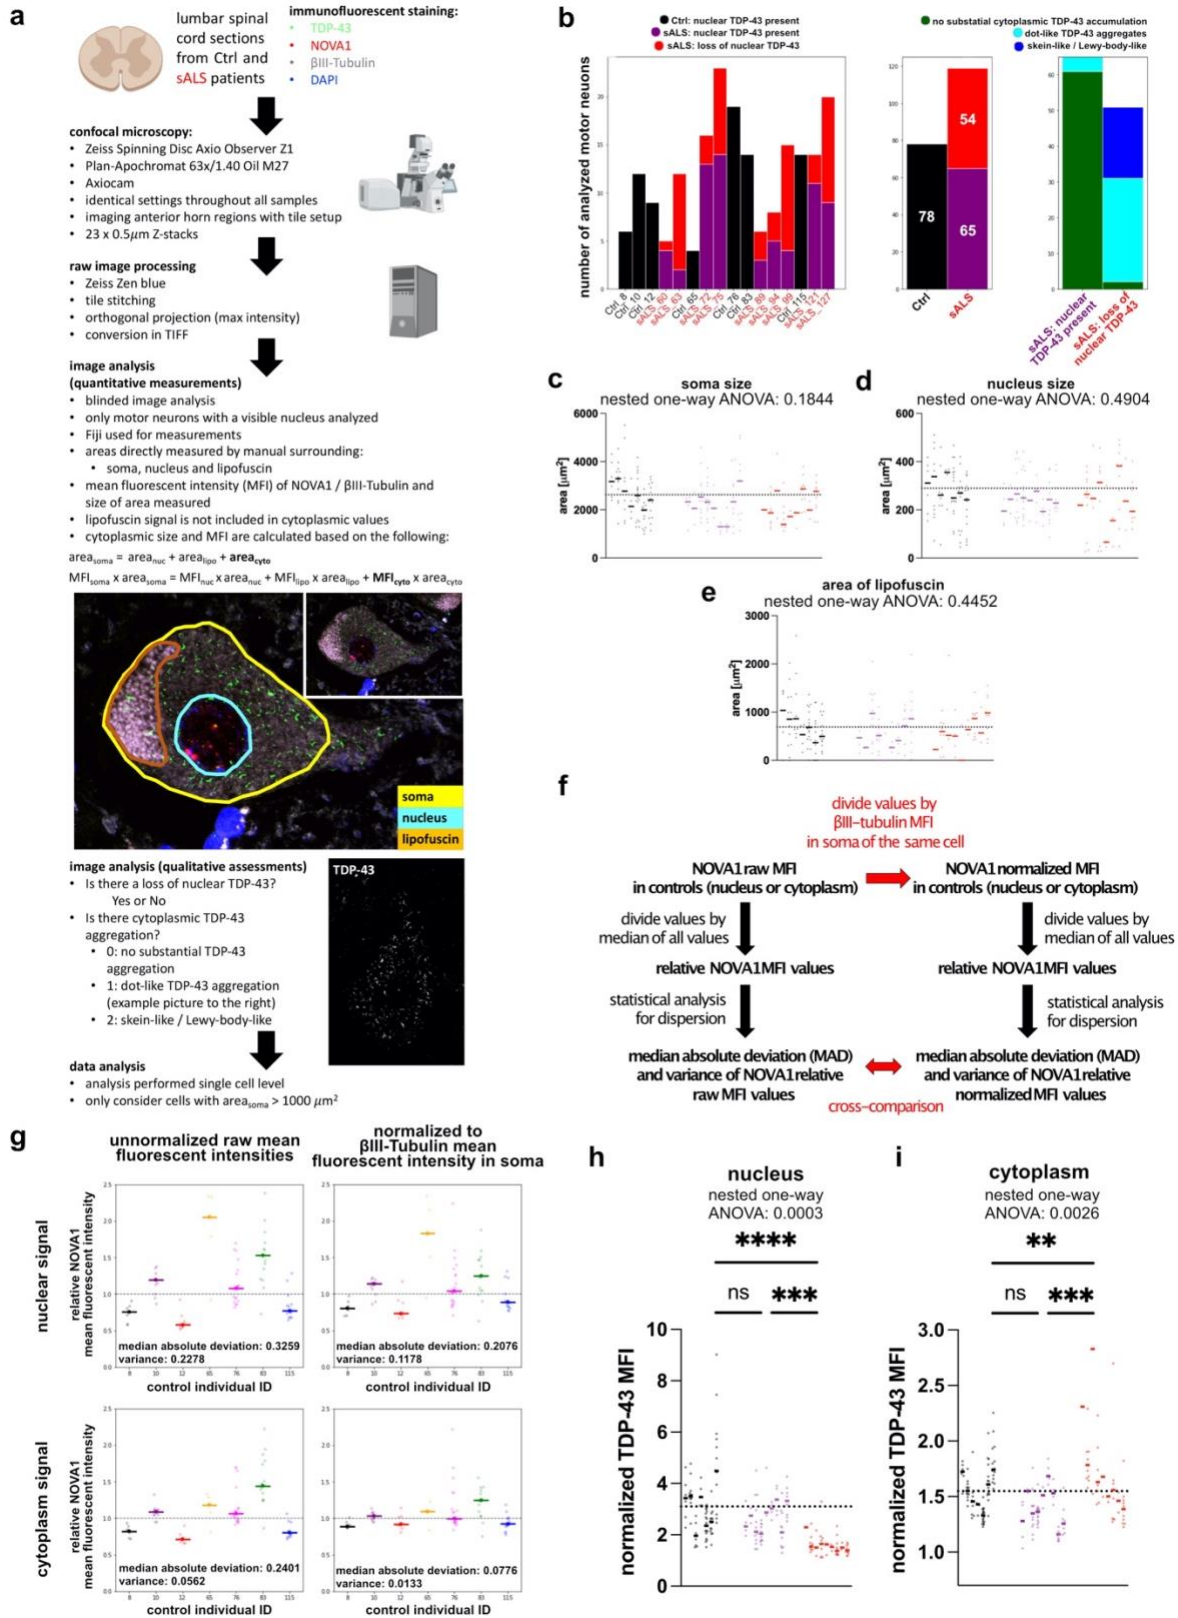

Online Resource Fig. 10. Related to Fig. 6. Analysis of human spinal cord samples from ALS patients and controls.

(a) Schematic illustrating detailed analysis strategy and pipeline for tissue section analysis.

(b) Bar graphs of the number of analyzed MNs and their respective status regarding TDP-43 pathology (purple: retained nuclear TDP-43, red: loss of nuclear TDP-43, green: no cytoplasmic TDP-43 accumulation, cyan: dot-like cytoplasmic TDP-43 aggregation, blue: skein-like/Lewy-body-like TDP-43 aggregation, black: Ctrl).

(c-e) Scatter plots illustrating (c) soma size, (d) nucleus size and (e) lipofuscin area of individual MNs (dots) in the different individuals analyzed (line) Ctrl (black), sALS with nuclear TDP-43 (purple) and sALS with loss of nuclear TDP-43 (red). Dashed horizontal line represent median in Ctrl. Statistical differences between the three groups were determined by nested one-way ANOVA.

(f) Schematic illustrating bIII-tubulin normalization strategy to NOVA1 intensities.

(g) Scatter plots of relative nuclear (top) and cytoplasmic (bottom) NOVA1 staining intensity of non-normalized (left) and bIII-tubulin normalized (right) values. Horizontal lines indicate medians. Statistical analysis performed on medians from individuals.

(h) Scatter plot of bIII-tubulin normalized mean nuclear TDP-43 staining intensities of single MNs (dots) their average in an individual (line). Dashed represents median in Ctrl. Statistical significance was determined by nested one-way ANOVA. \* P value < 0.05; \*\* P value < 0.01; \*\*\* P value < 0.001; \*\*\*\* P value < 0.0001. Significant variation between individuals within a group: P value < 0.0001.

(i) Scatter plot of bIII-tubulin normalized mean cytoplasmic TDP-43 intensities of single MN (dots) their average in an individual (line). Dashed represents median in Ctrl. Statistical significance was determined by nested one-way ANOVA. \* P value < 0.05; \*\* P value < 0.01; \*\*\* P value < 0.001; \*\*\*\* P value < 0.0001. Significant variation between individuals within a group: P value > 0.05.



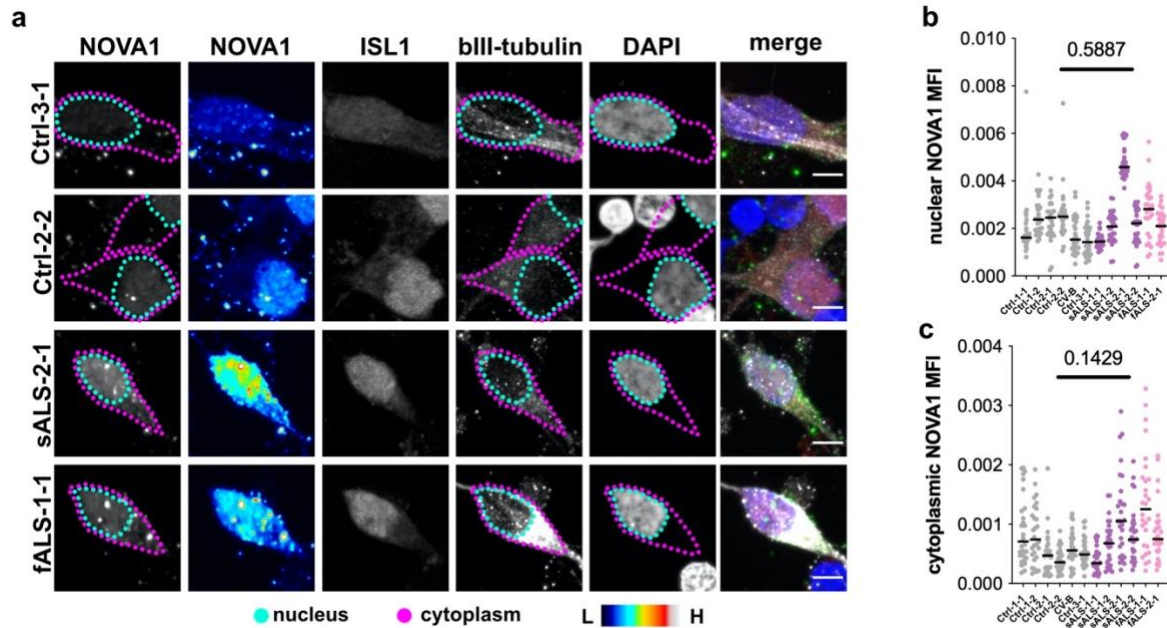

**Online Resource Fig. 11. Related to Figure 6. NOVA1 localization in Ctrl and ALS iPSC-MN**

(a) Representative images of iPSC-MNs stained for NOVA1 (green), ISL1 (red), bIII-tubulin (gray) and DAPI (blue). Analyzed areas are indicated by the dashed lines (nuclear area, cyan; cytoplasmic area, fuchsia). NOVA1 fluorescence intensities are also illustrated in an intensity heatmap. Scale bar: 5µm.

(b) Scatter plot of nuclear NOVA1 mean fluorescent intensities (MFI) of individual ISL1 MN (n=28/cell line; dots) in Ctrl (n=6) and ALS (n=6). Black bar represents median in a cell line. Statistical significance was determined on medians by Mann-Whitney U test. P value = 0.5887.

(c) Scatter plot of cytoplasmic NOVA1 mean fluorescent intensities (MFI) of individual ISL1 MN (n=28/cell line; dots) in Ctrl (n=6) and ALS (n=6). Black bar represents median in a cell line. Statistical significance was determined on medians by Mann-Whitney U test. P value = 0.1429.



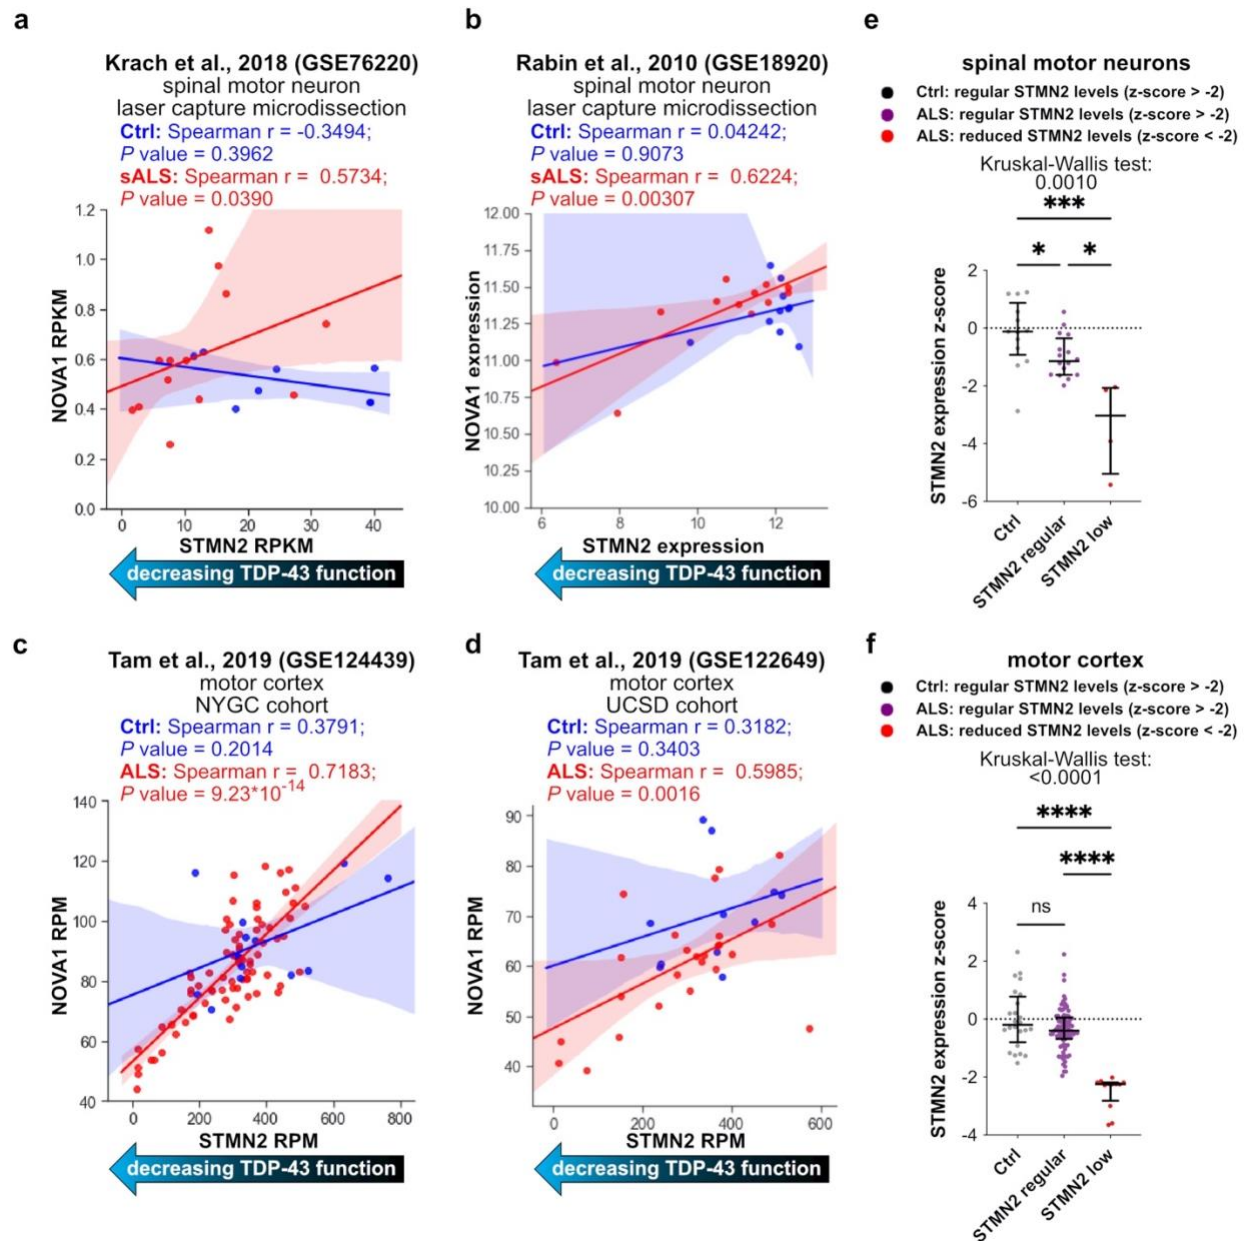

**Online Resource Fig. 12. Related to Fig. 6.** Correlation of NOVA1 and STMN2 expression values in publicly available datasets.

(a-d) Scatter plot of the correlation of NOVA1 and STMN2 expression in ALS (red) and Ctrl (blue) samples in publicly available datasets from (a) RNA-seq from LCM MNs [32], (b) microarray from LCM MNs [55], (c) RNA-seq from motor cortex from NYGC and (d) the UCSD cohort [63]. Spearman rank correlation coefficients in Ctrl and ALS and significance of correlation are shown above each graph.

(e) Scatter plot of STMN2 expression Z-scores from LCM MN from [32] and [55] based on Ctrl STMN2 expression in a dataset. Medians and interquartile ranges are shown. Statistical significance was determined by Kruskal-Wallis test and Dunn's post hoc test. \* P value < 0.05; \*\* P value < 0.01; \*\*\* P value < 0.001; \*\*\*\* P value < 0.0001.

(f) Scatter plot of STMN2 expression Z-scores from motor cortex datasets from NYGC and the UCSD cohort [63] based on Ctrl STMN2 expression in a dataset. Medians and interquartile ranges are shown.. Statistical significance was determined by Kruskal-Wallis test and Dunn's post hoc test. \* P value < 0.05; \*\* P value < 0.01; \*\*\* P value < 0.001; \*\*\*\* P value < 0.0001.

| patient | iPSC-line | sex | diagnosis | family history | pathogenic variant      | age at onset | age at biopsy | UMN signs | LMN signs | line ID        | origin       | repro-gramming |
|---------|-----------|-----|-----------|----------------|-------------------------|--------------|---------------|-----------|-----------|----------------|--------------|----------------|
| Ctrl-1  | Ctrl-1-1  | M   | Ctrl      | no             | no                      | N/A          | 26            | N/A       | N/A       | UKERiff2-X-18  | UKER         | RV             |
|         | Ctrl-1-2  |     |           |                |                         |              |               |           |           | UKERiff2-SC-11 |              |                |
| Ctrl-2  | Ctrl-2-1  | F   | Ctrl      | no             | no                      | N/A          | 45            | N/A       | N/A       | UKERi33q-E-2   | UKER         | RV             |
|         | Ctrl-2-2  |     |           |                |                         |              |               |           |           | UKERi33q-E-6   |              |                |
| Ctrl-3  | Ctrl-3-1  | F   | Ctrl      | yes*           | no                      | N/A          | 52            | N/A       | N/A       | KinI-ALS-17.2  | UCSD         | SV             |
|         | Ctrl-3-2  |     |           |                |                         |              |               |           |           | KinI-ALS-17.5  |              |                |
| CV      | CV-B      | M   | Ctrl      | no             | no                      | N/A          | N/A           | N/A       | N/A       | CV-B           | Gore et al.  | RV             |
| sALS-1  | sALS-1-1  | M   | ALS       | no             | no                      | 18           | 22            | yes       | yes       | UKERiu5q-E-8   | UKER         | RV             |
|         | sALS-1-2  |     |           |                |                         |              |               |           |           | UKERiu5q-SC-1  |              |                |
| sALS-2  | sALS-2-1  | M   | ALS       | no             | no                      | 47           | 50            | yes       | yes       | UKERizxx-E-10  | UKER         | RV             |
|         | sALS-2-2  |     |           |                |                         |              |               |           |           | UKERizxx-E-16  |              |                |
| fALS-1  | fALS-1-1  | M   | ALS       | yes            | TDP-43 <sup>N352S</sup> | N/A          | 53            | N/A       | N/A       | ALS17.5        | UCSD         | SV             |
| fALS-2  | fALS-2-1  | F   | ALS       | yes            | TDP-43 <sup>G298S</sup> | N/A          | N/A           | N/A       | N/A       | t.Bird2        | Alami et al. | RV             |

**Online Resource Table 1. Related to Figure 1.** Patient specifications for iPSC used in this study.

F = female, M = Male, UCSD = University of California San Diego, UKER = Universitätsklinikum Erlangen, RV = retrovirus, SV = Sendai virus, \* Ctrl-3 and fALS-1 are siblings. CV in CV-B stands for the donor Craig Venter.

| <b>patient_ID</b>    | <b>assigned_group</b> |
|----------------------|-----------------------|
| CASE-<br>NEUEM720BUU | C9-ALS                |
| CASE-<br>NEUTN952DDG | C9-ALS                |
| CASE-<br>NEUYY225MNZ | C9-ALS                |
| CASE-<br>NEUCE965ZGK | C9-ALS                |
| CASE-<br>NEUDT709YHN | C9-ALS                |
| CTRL-NEUAJ025JC3     | Ctrl                  |
| CTRL-NEUCV809LL4     | Ctrl                  |
| CTRL-<br>NEUDM126GNG | Ctrl                  |
| CTRL-<br>NEUEY565NWT | Ctrl                  |
| CTRL-<br>NEUFZ500KDB | Ctrl                  |
| CTRL-<br>NEUFZ508VBV | Ctrl                  |
| CTRL-<br>NEUJX341NDP | Ctrl                  |
| CTRL-<br>NEUKW131XJ2 | Ctrl                  |
| CTRL-<br>NEURJ861MMD | Ctrl                  |
| CASE-<br>NEUAF553MJ3 | sALS                  |

|                      |      |
|----------------------|------|
| CASE-<br>NEUAM655HF7 | sALS |
| CASE-<br>NEUDG000ZG5 | sALS |
| CASE-<br>NEUGW326BRV | sALS |
| CASE-<br>NEUPN525XEW | sALS |
| CASE-<br>NEUTA689LN5 | sALS |
| CASE-<br>NEUVM674HUA | sALS |
| CASE-<br>NEUAG603XLK | sALS |
| CASE-<br>NEUVF888UHM | sALS |

**Online Resource Table 2. Related to Figure 2.** AnswerALS datasets used for final analysis.

| patient number | primary diagnosis | age | gender | disease onset          | disease duration |
|----------------|-------------------|-----|--------|------------------------|------------------|
| 10             | Control           | 78  | Male   | N/A                    | N/A              |
| 76             | Control           | 68  | Male   | N/A                    | N/A              |
| 115            | Control           | 94  | Male   | N/A                    | N/A              |
| 65             | Control           | 82  | Male   | N/A                    | N/A              |
| 83             | Control           | 63  | Female | N/A                    | N/A              |
| 8              | Control (AD)      | N/A | N/A    | N/A                    | N/A              |
| 12             | Control (AD)      | N/A | N/A    | N/A                    | N/A              |
| 60             | SALS              | 58  | Female | Bulbar                 | 3                |
| 63             | SALS              | 68  | Male   | Arm                    | 2.5              |
| 72             | SALS              | 77  | Female | Bulbar                 | 6                |
| 75             | SALS              | 52  | Male   | Arm                    | 3.5              |
| 89             | SALS              | 36  | Male   | Bulbar                 | 3                |
| 94             | SALS              | 62  | Male   | Bulbar                 | 7                |
| 99             | SALS              | 70  | Female | Bulbar                 | 2.5              |
| 121            | SALS              | 67  | Male   | Right hand             | 2.5              |
| 127            | SALS              | 67  | Male   | Right hand/Respiratory | 1.5              |

**Online Resource Table 3. Related to Figure 6.** Summary of individuals used for postmortem imaging analysis. AD = Alzheimer's disease



| REAGENT or RESOURCE           | SOURCE                   | IDENTIFIER    |
|-------------------------------|--------------------------|---------------|
| Antibodies                    |                          |               |
| rabbit anti-TDP-43            | Bethyl Laboratories Inc. | A303-223A     |
| mouse anti-TDP-43             | Novus Biologicals        | H00023435-M01 |
| rabbit anti-NOVA1             | abcam                    | ab183024      |
| rabbit anti-NOVA2             | ProteinTech              | 55002-1-AP    |
| rabbit anti-beta-III-Tubulin  | abcam                    | ab18207       |
| chicken anti-beta-III-Tubulin | Millipore                | AB9354        |
| chicken anti-beta-III-Tubulin | abcam                    | ab107216      |
| rabbit anti-RBM9 (RBFOX2)     | Bethyl Laboratories Inc. | A300-864A     |
| rabbit anti-RBFOX3            | abcam                    | ab177487      |
| mouse anti-ELAVL4             | Santa Cruz Biotechnology | sc-48421      |
| mouse anti-FXR2               | ThermoFisher             | MA1-16767     |
| mouse anti-ISL1               | DSHB                     | 39.4D5-s      |
| rabbit anti-OLIG2             | Millipore                | AB9610        |
| mouse anti-GAPDH              | Millipore                | CB1001        |
| anti-PAX6-APC                 | Miltenyi Biotec          | 130-123-267   |
| anti-NESTIN-PerCp-Cy5.5       | BD Biosciences           | 561231        |

|                                               |                                                  |                 |
|-----------------------------------------------|--------------------------------------------------|-----------------|
| anti-beta-III-Tubulin-PB                      | novusbio                                         | NB600-1018AF405 |
| anti-ISL1-PE                                  | BD Biosciences                                   | 562547          |
| anti-rabbit-IgG-488                           | ThermoFisher                                     | A21449          |
| anti-rabbit-IgG-546                           | ThermoFisher                                     | A10040          |
| anti-mouse-IgG-546                            | ThermoFisher                                     | A10036          |
| anti-chicken-IgY 647                          | Santa Cruz Biotechnology                         | sc-2718         |
| anti-rabbit-IgG-HRP                           | ThermoFisher                                     | SA1-200         |
| anti-mouse-IgG-HRP                            | ThermoFisher                                     | SA1-100         |
| Bacterial and virus strains                   |                                                  |                 |
| One Shot™ Stbl3™ Chemically Competent E. coli | ThermoFisher                                     | C737303         |
| Biological samples                            |                                                  |                 |
| Human spinal cord tissue sections             | John Ravits, University of California, San Diego | N/A             |
| Chemicals, peptides, and recombinant proteins |                                                  |                 |
| Matrigel                                      | Corning                                          | 354230          |
| Geltrex                                       | ThermoFisher                                     | A1413302        |
| Poly-D-Lysine                                 | Sigma-Aldrich                                    | P6407-5mg       |
| Laminin                                       | ThermoFisher                                     | 23017-015       |
| Laminin                                       | Sigma-Aldrich                                    | L2020           |

|                          |                       |                |
|--------------------------|-----------------------|----------------|
| mTeSR Plus 5X Supplement | STEMCELL Technologies | 100-0275/100ml |
| mTESR Plus Basal Medium  | STEMCELL Technologies | 100-0274       |
| DMEM/F12+Glutamax        | ThermoFisher          | 31331028       |
| Pen/Strep                | ThermoFisher          | 15140122       |
| N2 Supplement            | Invitrogen            | 17502-048      |
| B27 Supplement           | Invitrogen            | 17504-044      |
| Y-27632 (ROCK inhibitor) | Tocris                | 1254           |
| Dorsomorphin             | Tocris                | 3093           |
| SB431542                 | Miltenyi Biotec       | 130-106-543    |
| CHIR99021                | Tocris                | 4423           |
| Retinoic acid            | Tocris                | 1254           |
| SAG                      | Tocris                | 4366           |
| DAPT                     | Tocris                | 2634           |
| BDNF                     | PeproTech             | 450-02         |
| GDNF                     | PeproTech             | 450-10         |
| CNTF                     | PeproTech             | 450-13         |
| Sodium arsenate          | Sigma Aldrich         | S7400          |
| ReLeSR                   | STEMCELL Technologies | 05872          |

|                                                               |                        |                                                                                               |
|---------------------------------------------------------------|------------------------|-----------------------------------------------------------------------------------------------|
| Accutase                                                      | ThermoFisher           | A11105-01                                                                                     |
| Triple                                                        | Gibco                  | 12605-010                                                                                     |
| FBS                                                           | ThermoFisher           | 10500-064                                                                                     |
| OptiMEM                                                       | ThermoFisher           | 51985026                                                                                      |
| Puromycin                                                     | Gibco                  | A11138-03                                                                                     |
| CloneR                                                        | Stem Cell Technologies | 05888                                                                                         |
| Critical commercial assays                                    |                        |                                                                                               |
| Lipofectamine 3000                                            | ThermoFisher           | L3000008                                                                                      |
| 660-DEVD-FMK<br>inhibitor reagent                             | caspase-3/7<br>abcam   | ab270785                                                                                      |
| Live-or-Dye                                                   | Biotium                | 32008-T                                                                                       |
| Deposited data                                                |                        |                                                                                               |
| Uncropped western blots                                       | This paper             | <a href="http://dx.doi.org/10.17632/v7p6dh5tvc.1">http://dx.doi.org/10.17632/v7p6dh5tvc.1</a> |
| FACS raw data (fcs files)                                     | This paper             | <a href="http://dx.doi.org/10.17632/v7p6dh5tvc.1">http://dx.doi.org/10.17632/v7p6dh5tvc.1</a> |
| MaxQuant quantification of<br>peptides from mass spectrometry | This paper             | <a href="http://dx.doi.org/10.17632/v7p6dh5tvc.1">http://dx.doi.org/10.17632/v7p6dh5tvc.1</a> |
| rMATS outputs                                                 | This paper             | <a href="http://dx.doi.org/10.17632/v7p6dh5tvc.1">http://dx.doi.org/10.17632/v7p6dh5tvc.1</a> |
| counts files                                                  | This paper             | <a href="http://dx.doi.org/10.17632/v7p6dh5tvc.1">http://dx.doi.org/10.17632/v7p6dh5tvc.1</a> |
| DESeq2 outputs                                                | This paper             | <a href="http://dx.doi.org/10.17632/v7p6dh5tvc.1">http://dx.doi.org/10.17632/v7p6dh5tvc.1</a> |
| eCLIP-seq peaks (bed file,<br>unfiltered)                     | This paper             | <a href="http://dx.doi.org/10.17632/v7p6dh5tvc.1">http://dx.doi.org/10.17632/v7p6dh5tvc.1</a> |

|                                        |            |                                                                                               |
|----------------------------------------|------------|-----------------------------------------------------------------------------------------------|
| Postmortem image analysis              | This paper | <a href="http://dx.doi.org/10.17632/v7p6dh5tvc.1">http://dx.doi.org/10.17632/v7p6dh5tvc.1</a> |
| RNA-seq: sALS vs. Ctrl                 | This paper | EGAD00001008424, EGA, ega-archive.org                                                         |
| RNA-seq: fALS vs. Ctrl                 | This paper | EGAD00001008425, EGA, ega-archive.org                                                         |
| eCLIP-seq: TDP-43                      | This paper | EGAD00001008426, EGA, ega-archive.org                                                         |
| eCLIP-seq: NOVA1, NOVA2, RBFOX2        | This paper | EGAD00001008428, EGA, ega-archive.org                                                         |
| RNA-seq: EGFP vs. NOVA1 overexpression | This paper | EGAD00001008423, EGA, ega-archive.org                                                         |
| RNA-seq: NOVA1 wt vs. NOVA1 K.O.       | This paper | EGAD00001008427, EGA, ega-archive.org                                                         |
| Experimental models: Cell lines        |            |                                                                                               |
| iPSC: CV-B                             | [24]       | N/A                                                                                           |
| iPSC: KinI ALS17.5 (Ctrl-3-1)          | [32]       | N/A                                                                                           |
| iPSC: ALS17.5 (fALS-1-1)               | [32]       | N/A                                                                                           |
| iPSC: t.Bird2 (fALS-2-1)               | [2]        | N/A                                                                                           |
| iPSC: UKERiff2-X-18 (Ctrl-1-1)         | This paper | N/A                                                                                           |
| iPSC: UKERiff2-SC-11 (Ctrl-1-2)        | This paper | N/A                                                                                           |
| iPSC: UKERi33q-E-2 (Ctrl-2-1)          | [27]       | N/A                                                                                           |
| iPSC: UKERi33q-E-6 (Ctrl-2-2)          | [27]       | N/A                                                                                           |
| iPSC: UKERiu5q-E-8 (sALS-1-1)          | This paper | N/A                                                                                           |
| iPSC: UKERiu5q-SC-1 (sALS-1-2)         | This paper | N/A                                                                                           |

|                                |            |     |
|--------------------------------|------------|-----|
| iPSC: UKERizxx-E-10 (sALS-2-1) | This paper | N/A |
| iPSC: UKERizxx-E-16 (sALS-2-2) | This paper | N/A |
| iPSC: CV-B NOVA1 K.O. #1       | This paper | N/A |
| iPSC: CV-B NOVA1 K.O. #3       | This paper | N/A |
| iPSC: CV-B NOVA1 K.O. #9       | This paper | N/A |
| iPSC: CV-B NOVA1 K.O. #11      | This paper | N/A |
| iPSC: CV-B NOVA1 K.O. #12      | This paper | N/A |
| iPSC: CV-B NOVA1 wt. #16       | This paper | N/A |
| iPSC: CV-B NOVA1 wt. #22       | This paper | N/A |
| iPSC: CV-B NOVA1 wt. #30       | This paper | N/A |
| iPSC: CV-B NOVA1 wt. #40       | This paper | N/A |
| iPSC: UKERi4AA-S006            | [25]       | N/A |
| iPSC: UKERi4AA-S-14A           | [25]       | N/A |
| iPSC: UKERiK22-S-001           | [25]       | N/A |
| iPSC: UKERiK22-S-003           | [25]       | N/A |
| iPSC: UKERiG7G-S-001           | [53]       | N/A |
| iPSC: UKERiG7G-S-008           | [53]       | N/A |
| iPSC: UKERi33Q-S-006           | [25]       | N/A |

|                                 |                            |                                                                                                           |
|---------------------------------|----------------------------|-----------------------------------------------------------------------------------------------------------|
| iPSC: UKERi33Q-R-106            | [25]                       | N/A                                                                                                       |
| iPSC: UKERi82A-S-004            | [25]                       | N/A                                                                                                       |
| iPSC: UKERi82A-S022             | [25]                       | N/A                                                                                                       |
| iPSC: UKERi55O-S-002            | [25]                       | N/A                                                                                                       |
| iPSC: UKERi55O-S-004            | [25]                       | N/A                                                                                                       |
| ES: HuES6 clone 2, (wt)         | [53]                       | N/A                                                                                                       |
| ES: HuES6 clone 15 (SPG11 K.O.) | [53]                       | N/A                                                                                                       |
| Human HEK293T                   |                            |                                                                                                           |
| Recombinant DNA                 |                            |                                                                                                           |
| Plasmid: Lenti-CRISPR v2        | [57]                       | Addgene plasmid #52961                                                                                    |
| Plasmid: LV-CAG-EGFP-P2A-PuroR  | This paper                 | N/A                                                                                                       |
| Plasmid: LV-CAG-NOVA1-P2A-PuroR | This paper                 | N/A                                                                                                       |
| Software and algorithms         |                            |                                                                                                           |
| STAR                            | [18]                       | <a href="https://github.com/alexdobin/STAR">https://github.com/alexdobin/STAR</a>                         |
| Cutadapt                        | [43]                       | <a href="https://cutadapt.readthedocs.io/en/stable/">https://cutadapt.readthedocs.io/en/stable/</a>       |
| Samtools                        | [34]                       | <a href="http://samtools.sourceforge.net/">http://samtools.sourceforge.net/</a>                           |
| Python                          | Python Software Foundation | <a href="https://www.python.org/">https://www.python.org/</a>                                             |
| GraphPad Prism 9                | GraphPad Software, Inc.    | <a href="http://graphpad.com/scientific-software/prism">http://graphpad.com/scientific-software/prism</a> |

|                                                                             |                      |                                                                                                                                                           |
|-----------------------------------------------------------------------------|----------------------|-----------------------------------------------------------------------------------------------------------------------------------------------------------|
| Pybedtools                                                                  | [14]                 | <a href="https://daler.github.io/pybedtools/">https://daler.github.io/pybedtools/</a>                                                                     |
| Subread                                                                     | [35]                 | <a href="http://subread.sourceforge.net/">http://subread.sourceforge.net/</a>                                                                             |
| ZEN blue                                                                    | Zeiss                | <a href="https://www.zeiss.com/microscopy/us/products/microscope-software.html">https://www.zeiss.com/microscopy/us/products/microscope-software.html</a> |
| rMATS                                                                       | [60]                 | <a href="http://rnaseq-mats.sourceforge.net/">http://rnaseq-mats.sourceforge.net/</a>                                                                     |
| Fiji                                                                        | [58]                 | <a href="https://imagej.net/Fiji">https://imagej.net/Fiji</a>                                                                                             |
| CytExpert                                                                   | Beckman Coulter      | <a href="https://www.beckman.com/flow-cytometry/instruments/cytoflex/software">https://www.beckman.com/flow-cytometry/instruments/cytoflex/software</a>   |
| CLIPper                                                                     | [39]                 | <a href="https://github.com/YeoLab/clipper">https://github.com/YeoLab/clipper</a>                                                                         |
| CellProfiler                                                                | [45]                 | <a href="https://cellprofiler.org/">https://cellprofiler.org/</a>                                                                                         |
| Scikit-learn                                                                | [51]                 | <a href="https://scikit-learn.org/">https://scikit-learn.org/</a>                                                                                         |
| Other                                                                       |                      |                                                                                                                                                           |
| AnswerALS RNA-seq datasets                                                  | AnswerALS consortium | <a href="http://data.answerals.org">http://data.answerals.org</a>                                                                                         |
| Laser capture microdissection RNA-seq dataset form ALS patients and Ctrl    | [32]                 | GSE76220                                                                                                                                                  |
| Laser capture microdissection microarray dataset form ALS patients and Ctrl | [55]                 | GSE18920                                                                                                                                                  |
| Motor cortex RNA-seq datasets from ALS patients and Ctrl                    | [63]                 | GSE122649<br>GSE124439                                                                                                                                    |
| iPSC-MN, TARDBP knock down                                                  | [31]                 | GSE121569                                                                                                                                                 |
| SH-SY5Y, TARDBP knock down                                                  | [46]                 | GSE122069                                                                                                                                                 |
| Mouse striatum, TARDBP knock down                                           | [52]                 | GSE27394                                                                                                                                                  |
| Mouse brain, TDP-43-dNLS                                                    | [3]                  | GSE65973                                                                                                                                                  |



|                             |      |           |
|-----------------------------|------|-----------|
| iPSC-MN, puromycin stressed | [41] | GSE157467 |
|-----------------------------|------|-----------|

**Online Resource Table 4.** Detailed list of materials, biological samples, software and data used in this study.
